# Supplementary material for: Common molecular signatures between coronavirus infection and Alzheimer’s disease reveal targets for drug development
Source: PubMed Central journal article supplement — bioRxiv. 2023 Jun 15:2023.06.14.544970. Preprint. [Version 1] doi: 10.1101/2023.06.14.544970 (PMC10312734; doi:10.1101/2023.06.14.544970), 2023-06-15
Supplement: NIHPP2023.06.14.544970v1-supplement-2.pdf [file NIHPP2023.06.14.544970v1-supplement-2.pdf]

### Supplementary Figure 1:

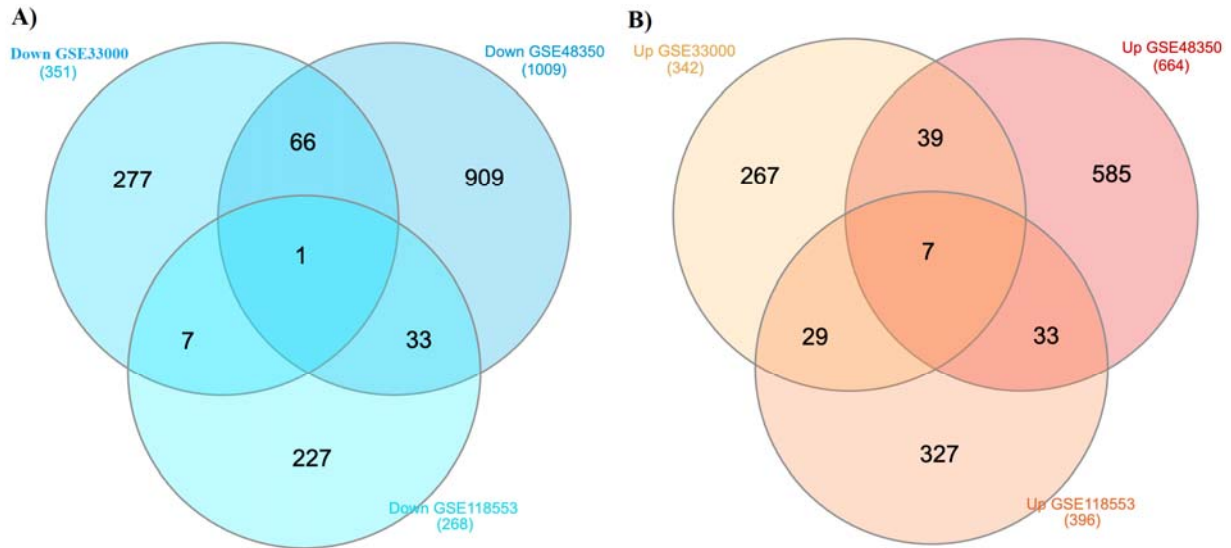

**Supplementary Figure 1: Comparison of the three transcriptome datasets of AD. (A)** Commonly down- and **(B)** up-regulated genes are shown by the Venn diagram.
